# Supplementary material
Source: HighWire-hosted journal article supplement (https://www.cfp.ca/highwire/filestream/43709/field_highwire_adjunct_files/0/Appendix_Supplemental_Information.pdf)
Supplement: Appendix_Supplemental_Information.pdf [file Appendix_Supplemental_Information.pdf]

Supplemental Text 1: Literature review search strategy and results on existing primary care performance frameworks

The literature search was performed using the MEDLINE (Ovid) and EMBASE databases with assistance from a specialized health librarian. The search included the following general concepts: “primary health care”, “performance”, “framework or indicators”. Specific keywords and results from the search are provided below. The search was limited to publications written in English between 2008 and 2018 and the North American context. The lower date limit was selected based on the publication of the Institute for Health Care Information (IHI)’s Triple Aim Initiative, which constituted a seminal work on the elaboration of frameworks in primary care.<sup>5</sup> Grey literature was also searched by reviewing reports and recommendations from international, national and state/provincial institutes focused on health system performance and quality. A backward citation tracking approach and expert consultation was also used to ensure any other potentially relevant frameworks were also included in the review.

Database: Embase <1996 to 2018 Week 09>

Search Strategy:

```
-----
1  exp primary health care/ (125207)
2  (primary health care or primary healthcare or primary care).m_titl. (46293)
3  1 or 2 (130151)
4  performance measurement system/ (3858)
5  (primary care performance or health system performance or healthcare performance or
health care performance or framework or indicators).mp. (334077)
6  (framework or indicators or performance).m_titl. (173590)
7  health care delivery/ (124000)
8  4 or 7 (127672)
9  3 and 5 and 6 and 8 (179)
10 limit 9 to (english and yr="2008 - 2018") (102)
```

\*\*\*\*\*

Database: Ovid MEDLINE(R) Epub Ahead of Print, In-Process & Other Non-Indexed Citations,  
Ovid MEDLINE(R) Daily, Ovid MEDLINE and Versions(R) <1946 to February 21, 2018>  
Search Strategy:

- 
- 1 exp primary health care/ (134814)
  - 2 (primary health care or primary healthcare or primary care).m\_titl. (45109)
  - 3 1 or 2 (148157)
  - 4 Quality indicators, Health Care/ (13530)
  - 5 (primary care performance or health system performance or healthcare performance or health care performance or framework or indicators).mp. (392530)
  - 6 (framework or indicators or performance).m\_titl. (204851)
  - 7 "Delivery of Health Care"/ (78084)
  - 8 4 or 7 (91018)
  - 9 3 and 5 and 6 and 8 (423)
  - 10 limit 9 to (yr="2008 - 2018" and english) (256)
-

## **SURVEY QUESTIONNAIRE**

### **Choosing key indicators of care management in primary care for persons newly diagnosed with dementia**

The goal of this survey is to get your input on which measures of care management for patients newly diagnosed with dementia in primary care are most important from your point of view.

As key stakeholders, your participation will be essential in deciding which measures should be prioritized and evaluated on a regular basis.

This survey should take around **15 minutes** to complete.

Your participation in this survey is completely voluntary. By completing this questionnaire, you consent to participate in this study. There are no known risks, side effects or disadvantages associated with this research study. We will ensure the confidentiality of the information collected. The information will, in no case, be transmitted to other persons not involved in this study. This survey has been approved by the research ethics committee of the Canadian Consortium of Neurodegeneration in Aging.

If you have questions about this survey or study, please contact Dr. Isabelle Vedel ([isabelle.vedel@mcgill.ca](mailto:isabelle.vedel@mcgill.ca)) or Ms. Nadia Sourial ([nadia.sourial@mail.mcgill.ca](mailto:nadia.sourial@mail.mcgill.ca)).

Thank you for your participation!

**Demographic information for statistics purposes:**

From what perspective are you answering this survey (check only 1)?

- ☐ As a patient / caregiver representative (e.g. Alzheimer Societies)
- ☐ As a clinician
- ☐ As a government representative
- ☐ As a manager
- ☐ Other

Please select your age group:

- ☐ Less than 35
- ☐ 35-44
- ☐ 45-54
- ☐ 55-64
- ☐ 65 and over

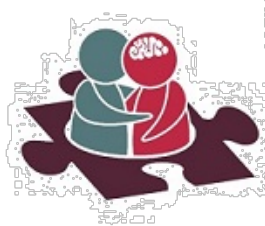

**ROSA**  
Research on Organization  
of Healthcare Services for  
Alzheimers  
Recherche en organisation  
des services sur l'Alzheimer

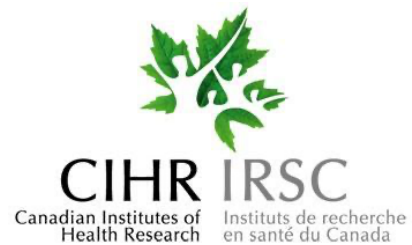

| <b>Indicator of care management in primary care for persons newly diagnosed with dementia</b>                                | <b>Check ( ✓ ) a maximum of 10 indicators that you feel are most important</b> |
|------------------------------------------------------------------------------------------------------------------------------|--------------------------------------------------------------------------------|
| 1. Access to a regular family doctor (or nurse practitioner)                                                                 |                                                                                |
| 2. Avoidable hospitalizations                                                                                                |                                                                                |
| 3. Non-urgent visits to the Emergency Department of the hospital                                                             |                                                                                |
| 4. Diagnosis at an early stage of the disease                                                                                |                                                                                |
| 5. After-hours access to the regular family doctor                                                                           |                                                                                |
| 6. Coordination between different health care providers                                                                      |                                                                                |
| 7. Readmission to the hospital within 30 days following a hospitalization                                                    |                                                                                |
| 8. Visit to the regular family doctor within 7 days following a hospitalization                                              |                                                                                |
| 9. Referrals to specialists in dementia (geriatrician, neurologist, psychiatrist) originating from the regular family doctor |                                                                                |
| 10. Referrals to other specialists (e.g. cardiologist, oncologist) originating from the regular family doctor                |                                                                                |
| 11. Requests for blood tests originating from the regular family doctor                                                      |                                                                                |
| 12. Phone calls between the regular family doctor and specialists                                                            |                                                                                |
| 13. Dementia diagnosed by the regular family doctor                                                                          |                                                                                |
| 14. Medications prescribed for dementia (e.g. Exelon®, Reminyl®, Aricept®, Ebixa®)                                           |                                                                                |
| 15. First medication for dementia prescribed by the regular family doctor                                                    |                                                                                |
| 16. Annual visits to the regular family doctor                                                                               |                                                                                |
| 17. Annual cost of health services                                                                                           |                                                                                |
| 18. Duplication of medical tests (e.g. blood tests, CT / MRI scans)                                                          |                                                                                |

|                                                                                                                                                                                                        |  |
|--------------------------------------------------------------------------------------------------------------------------------------------------------------------------------------------------------|--|
| <b>19.</b> Length of time spent in hospital in the year following diagnosis of dementia                                                                                                                |  |
| <b>20.</b> Equitable care across all patients (e.g. age, sex, income, region, immigrant status)                                                                                                        |  |
| <b>21.</b> Yearly flu shot (immunization for influenza)                                                                                                                                                |  |
| <b>22.</b> Potentially inappropriate prescriptions for medications (e.g. benzodiazepines, antipsychotics, anticholinergics, tricyclic antidepressants, trazodone) associated with serious side effects |  |
| <b>23.</b> Having a high number of medications                                                                                                                                                         |  |
| <b>24.</b> Access to counselling for patients                                                                                                                                                          |  |
| <b>25.</b> Access to counselling for caregivers                                                                                                                                                        |  |
| <b>26.</b> Access to home care                                                                                                                                                                         |  |
| <b>27.</b> Access to long-term care                                                                                                                                                                    |  |
| <b>28.</b> Access to palliative end-of-life care                                                                                                                                                       |  |
| <b>29.</b> Number of days spent in hospital in last 3 months of life                                                                                                                                   |  |
| <b>30.</b> Dying at home                                                                                                                                                                               |  |

Thank you for your participation!

COMMENTS:

Supplemental Figure 1: PRISMA flow diagram for selection of eligible primary care frameworks

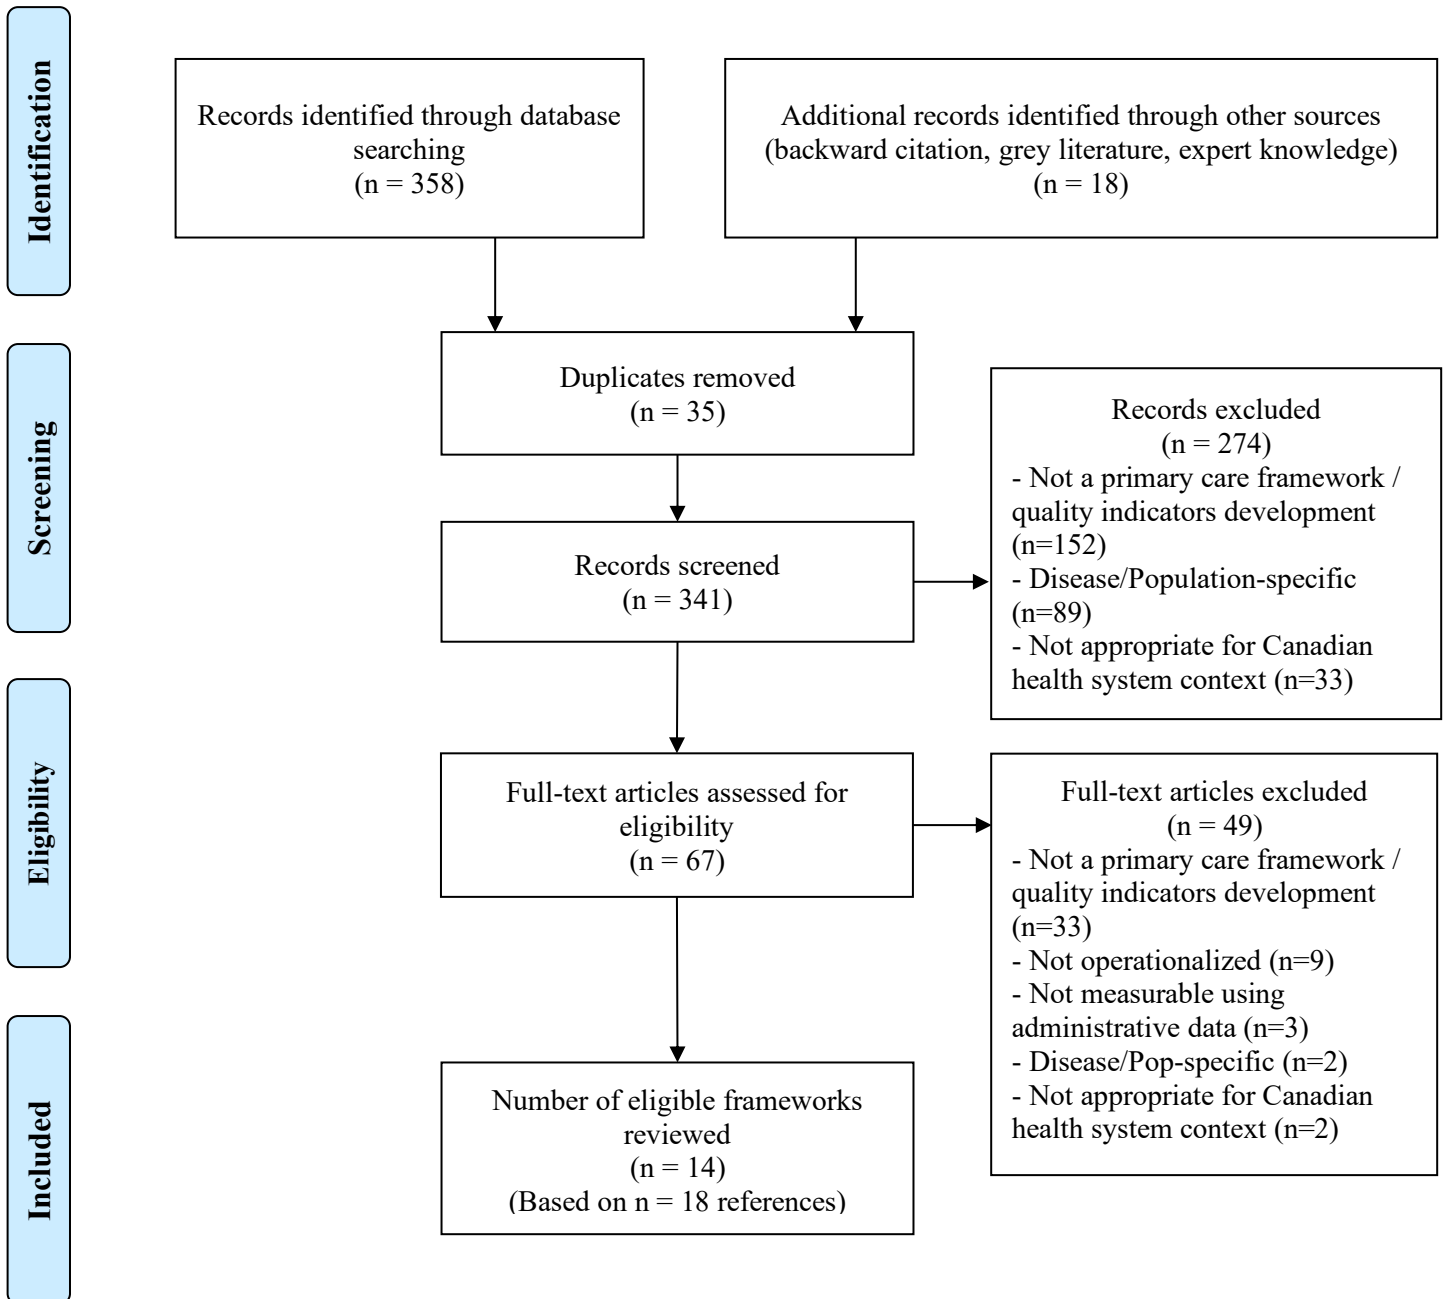

Supplemental Table 1: Scoring of eligible primary care frameworks

| <b>Name of framework / Description of indicators</b>                          | <b>Comprehensiveness</b> | <b>Focus on patient-level</b> | <b>Pertinence for older population</b> | <b>Measurability in administrative data</b> | <b>Publication (First author; year)</b>                                  |
|-------------------------------------------------------------------------------|--------------------------|-------------------------------|----------------------------------------|---------------------------------------------|--------------------------------------------------------------------------|
| (1=low to 4= high)                                                            |                          |                               |                                        |                                             |                                                                          |
| Primary care performance measurement framework (HQO)                          | 4                        | 3                             | 3                                      | 3                                           | HQO 2014 <sup>43</sup> , Haj-Ali 2017 <sup>35</sup>                      |
| Toward a Primary Care Strategy for Canada (CFHI)                              | 4                        | 3                             | 3                                      | 2                                           | CFHI 2012 <sup>32</sup>                                                  |
| Quality indicators of health system performance (IC/ES)                       | 2                        | 4                             | 2                                      | 4                                           | Stukel 2016 <sup>38</sup>                                                |
| Health System Performance Measurement Framework (CIHI)                        | 4                        | 2                             | 2                                      | 3                                           | CIHI 2012 <sup>40</sup> , 2016 <sup>33</sup> , Terner 2013 <sup>34</sup> |
| Triple Aim Initiative (IHI)                                                   | 3                        | 3                             | 2                                      | 2                                           | Stiefel 2012 <sup>29</sup> , 2013 <sup>30</sup>                          |
| Health Care Quality Indicators Project (OECD)                                 | 2                        | 3                             | 2                                      | 3                                           | Carinci 2015 <sup>31</sup>                                               |
| Quality Standards for Dementia: Care for People Living in the Community (HQO) | 2                        | 3                             | 3                                      | 2                                           | HQO 2018 <sup>25</sup>                                                   |
| Performance of primary healthcare Organizations (INSPQ)                       | 3                        | 2                             | 2                                      | 3                                           | Levesque 2010 <sup>36</sup>                                              |
| AHRQ Prevention Quality Indicators (AHRQ)                                     | 2                        | 3                             | 1                                      | 3                                           | AHRQ 2018 <sup>14</sup>                                                  |
| Primary health care performance measures (British Columbia U)                 | 3                        | 2                             | 2                                      | 2                                           | Broemeling 2009 <sup>11</sup>                                            |
| Quality Book of Tools (McMaster U)                                            | 3                        | 1                             | 2                                      | 1                                           | Levitt 2014 <sup>37</sup>                                                |
| Process quality indicators in family Medicine (QUALICOPC study)               | 2                        | 1                             | 1                                      | 1                                           | Pavlic 2015 <sup>39</sup>                                                |
| National Quality Forum                                                        | 4                        | 4                             | 4                                      | 1                                           | NQF 2014 <sup>41</sup>                                                   |



|                                                          |   |   |   |   |                          |
|----------------------------------------------------------|---|---|---|---|--------------------------|
| International Consortium for Health Outcomes Measurement | 1 | 4 | 4 | 1 | ICHOM 2017 <sup>42</sup> |
|----------------------------------------------------------|---|---|---|---|--------------------------|

Abbreviations: IHI, Institute for Healthcare Improvement; OECD, Organization for Economic Cooperation and Development; AHRQ, Agency for Healthcare Research and Quality; CFHI, Canadian Foundation for Healthcare Improvement; CIHI, Canadian Institute for Health Information; HQO, Health Quality Ontario; INSPQ, Institut national de santé publique du Québec; QUALICOPC, Quality and Costs of Primary Care in Europe; NQF, National Quality Forum; ICHOM, International Consortium for Health Outcomes Measurement

Supplemental Table 2: Description of databases for operationalization of framework indicators in Ontario

| Database                                     | Description                                                                                                                                                                                                                                                                                                                                                                                                                                                                                                                                                                                                                                                  |
|----------------------------------------------|--------------------------------------------------------------------------------------------------------------------------------------------------------------------------------------------------------------------------------------------------------------------------------------------------------------------------------------------------------------------------------------------------------------------------------------------------------------------------------------------------------------------------------------------------------------------------------------------------------------------------------------------------------------|
| Registered Persons Database (RPDB) - ON      | The RPDB provides basic demographic information (age, sex, location of residence, date of birth, and date of death for deceased individuals) for those issued an Ontario health insurance number. The RPDB also indicates the time periods for which an individual was eligible to receive publicly funded health insurance benefits and the best known postal code for each registrant on July 1st of each year.                                                                                                                                                                                                                                            |
| Ontario Health Insurance Plan (OHIP) - ON    | The OHIP claims database contains information on inpatient and outpatient services provided to Ontario residents eligible for the province's publicly funded health insurance system by fee-for-service health care practitioners (primarily physicians) and "shadow billings" for those paid through non-fee-for-service payment plans. Billing codes on the claims (OHIP fee codes) identify the care provider, their area of specialization and the type and location of service. OHIP billing claims also contain a 3-digit diagnosis code - the main reason for the service - captured using a modified version of the ICD, 8th revision coding system. |
| Client Agency Program Enrollment (CAPE) - ON | The CAPE file is a registry of all patients who have ever been rostered to receive care from a particular physician in Ontario, documents the time period in which a patient was rostered to a specific physician, and the associated primary care organization (e.g., Family Health Group (FHG), Family Health Network (FHN), Family Health Organization (FHO)).                                                                                                                                                                                                                                                                                            |
| Discharge Abstract Database (DAD) - CIHI     | The DAD is compiled by the Canadian Institute for Health Information and contains data on acute care hospital admissions. This includes clinical data (diagnoses, procedures and interventions), demographics, and administrative data (institution/hospital number, admission category and length of                                                                                                                                                                                                                                                                                                                                                        |

|                                                            |                                                                                                                                                                                                                                                                                                                                                                                                                                                                          |
|------------------------------------------------------------|--------------------------------------------------------------------------------------------------------------------------------------------------------------------------------------------------------------------------------------------------------------------------------------------------------------------------------------------------------------------------------------------------------------------------------------------------------------------------|
|                                                            | stay).                                                                                                                                                                                                                                                                                                                                                                                                                                                                   |
| National Ambulatory Care Reporting System (NACRS) - CIHI   | The NACRS is compiled by the Canadian Institute for Health Information and contains clinical (diagnoses and procedures), demographic, and administrative information for all patient visits made to hospital- and community-based ambulatory care centres (i.e., emergency departments, day surgery units, hemodialysis units, and cancer care clinics).                                                                                                                 |
| Ontario Drug Benefit (ODB) - ON                            | The ODB database contains prescription medication claims for those covered under the provincial drug program, mainly: those aged 65 years and older, nursing home residents, patients receiving services under the Ontario Home Care program, those receiving social assistance, and residents eligible for specialized drug programs. Records include drug identifier, patient, pharmacy and physician identifiers, long-term care indicator, and date of dispensation. |
| Home Care Database (HCD) - ON                              | The HCD captures all publicly funded home care services provided or coordinated in Ontario, and contains information on clients, admission, assessments, diagnostic and surgical procedures, and service delivered.                                                                                                                                                                                                                                                      |
| Continuous Care Reporting System (CCRS) - CIHI             | The CCRS and CCRS-LTC data are compiled by the Canadian Institute for Health Information and include demographic and clinical assessment data (on the physical, functional, cognitive, and social domains of health). Data are ascertained using the Resident Assessment Instrument Minimum Data Set (RAI-MDS) version 2.0 which is administered by trained healthcare professionals.                                                                                    |
| Resident Assessment Instrument for Home Care (RAI-HC) - ON | The RAI-HC gathers information on residents in publicly funded home care programs in Ontario and includes demographic and clinical assessment data (on the physical, functional, cognitive, and social domains of health).                                                                                                                                                                                                                                               |
| ICES Physician Database (IPDB) - ON                        | The IPDB contains information about physicians practicing in Ontario, including information on demographics (age, gender, year of graduation, school of graduation); specialty (functional                                                                                                                                                                                                                                                                               |

|                                                                       |                                                                                                                                                                                                                                                                  |
|-----------------------------------------------------------------------|------------------------------------------------------------------------------------------------------------------------------------------------------------------------------------------------------------------------------------------------------------------|
|                                                                       | and certified); location of practice; and measures of physician activity (billings and workload data).                                                                                                                                                           |
| National Rehabilitation Reporting System (NRS) - CIHI                 | The NRS is compiled by the Canadian Institute for Health Information and contains data collected on admission and discharges of adult inpatient rehabilitation patients for specialized facilities or hospital units with designated rehabilitation beds.        |
| Ontario Mental Health Reporting System (OMHRS) - ON                   | The OMHRS is compiled by the Canadian Institute for Health Information (CIHI) and contains administrative, clinical (diagnoses and procedures), demographic, and administrative information for all admissions to adult designated inpatient mental health beds. |
| Office of the Registrar General (ORGD) Vital Statistics Database - ON | The ORGD Vital Statistics Database contains information on all deaths registered in Ontario starting on January 1, 1990. Information on the causes of death (immediate, antecedent, and underlying) recorded on the death certificate are captured.              |

Supplemental Table 3: Description of databases for operationalization of framework indicators in Quebec

| Database                                                                                     | Description                                                                                                                                                                                   |
|----------------------------------------------------------------------------------------------|-----------------------------------------------------------------------------------------------------------------------------------------------------------------------------------------------|
| Banque de données commune des urgence (BDCU)                                                 | Contains personal information on episodes of care and services provided by a person registered in the emergency department                                                                    |
| Maintenance et exploitation des données pour l'étude de la clientèle hospitalière (MED-ECHO) | Contains personal clinical and administrative information related to the care and services provided to a person admitted to the hospital or registered for day surgery in a Quebec hospital   |
| Performance hospitalière (APR-DRG)                                                           | Contains personal clinical and administrative information related to the care and services rendered to a person admitted or registered for day surgery in a Quebec hospital center (extracted |

|                                                                                         |                                                                                                                                                                                                                                                                                                                 |
|-----------------------------------------------------------------------------------------|-----------------------------------------------------------------------------------------------------------------------------------------------------------------------------------------------------------------------------------------------------------------------------------------------------------------|
|                                                                                         | from MED-ÉCHO) to which is added other information related to the groupings assigned by the APR-DRG software, the calculation of the relative intensity level of the resources used (NIRRU) and other management indicators                                                                                     |
| Registre des événements démographiques (RED)                                            | Personal demographic information, including death (date and cause) on the population of Quebec                                                                                                                                                                                                                  |
| Système d'information sur la clientèle et les services des CSSS - mission CLSC (I-CLSC) | Contains personal information and providing data on requests for services, users and interventions concerning services offered in Centre services sociaux et de sante (CSSS) (Centre local des services communautaire (CLSC) mission). The database is used to describe the services provided on the front line |
| Fichier des services pharmaceutiques couverts par la RAMQ                               | The pharmacy services file contains information on pharmacy services provided under the public drug insurance plan administered by the RAMQ                                                                                                                                                                     |
| Fichier sur les périodes d'admissibilité à l'assurance médicaments de la RAMQ           | The Drug Benefit Eligibility Periods file contains information on the drug benefit eligibility periods of insured persons                                                                                                                                                                                       |
| Fichier sur les services médicaux rémunérés à l'acte par la RAMQ                        | Contains fee-for-service billing information from health professionals' claims submitted to RAMQ                                                                                                                                                                                                                |
| Fichier d'inscription des personnes assurées (FIPA)                                     | Demographic information on persons receiving services including date of birth and death, sex, postal code of residence.                                                                                                                                                                                         |

[Supplemental Table 4: Source and suggested operationalization of framework indicators by Health Quality Ontario domain of quality](#)

| HQO Domain | Indicator | Suggested operational definition | Available databases for operationalization in Ontario | Available databases for operationalization in Quebec | Indicator Source(s) |
|------------|-----------|----------------------------------|-------------------------------------------------------|------------------------------------------------------|---------------------|
|------------|-----------|----------------------------------|-------------------------------------------------------|------------------------------------------------------|---------------------|

|             |                                                                       |                                                                                                                                            |                  |                                         |                                                  |
|-------------|-----------------------------------------------------------------------|--------------------------------------------------------------------------------------------------------------------------------------------|------------------|-----------------------------------------|--------------------------------------------------|
| ACCESS      | Access to a regular primary care provider                             | UPC index > 0.5 <sup>a</sup><br>OR Rostering or virtual rostering with a primary care provider (e.g. family physician, nurse practitioner) | OHIP, CAPE, IPDB | Fee-for-service medical services (RAMQ) | HQO 2017 <sup>35</sup><br>HQO 2018 <sup>25</sup> |
|             | After-hours access to the regular primary care provider               | After-hours visits made to the regular primary care provider                                                                               | OHIP, CAPE, IPDB | Fee-for-service medical services (RAMQ) | HQO 2017 <sup>35</sup>                           |
|             | Access to an interprofessional primary care team                      | Type of primary care group affiliation                                                                                                     | CAPE             | Fee-for-service medical services (RAMQ) | HQO 2017 <sup>35</sup><br>HQO 2018 <sup>25</sup> |
|             | Visits to the regular primary care provider                           | Visits to the regular primary care provider                                                                                                | OHIP, IPDB, CAPE | Fee-for-service medical services (RAMQ) | HQO 2017 <sup>35</sup>                           |
|             | Non-urgent visits to the ED                                           | Visits to the ED with CTAS <sup>b</sup> level 4 (less urgent) or 5 (not urgent)                                                            | NACRS            | BDCU                                    | HQO 2017 <sup>35</sup><br>CIHI 2018 <sup>4</sup> |
| INTEGRATION | Continuity of care                                                    | Bice-Boxerman Continuity of Care index <sup>c</sup>                                                                                        | OHIP             | Fee-for-service medical services (RAMQ) | HQO 2017 <sup>35</sup>                           |
|             | Phone calls between the regular primary care provider and specialists | Phone calls between the regular primary care provider and specialists                                                                      | OHIP, CAPE, IPDB | Fee-for-service medical services (RAMQ) | HQO 2017 <sup>35</sup>                           |

|                |                                                                                      |                                                                                                   |                       |                                                   |                                                                                |
|----------------|--------------------------------------------------------------------------------------|---------------------------------------------------------------------------------------------------|-----------------------|---------------------------------------------------|--------------------------------------------------------------------------------|
|                | Length of time spent in hospital in the year following diagnosis of dementia         | Number of days spent in acute care hospital                                                       | DAD                   | MED-ECHO                                          | HQO 2018 <sup>25</sup>                                                         |
|                | Potentially avoidable hospitalizations                                               | Ambulatory care sensitive conditions (ACSC) <sup>d</sup> acute care hospitalizations              | DAD                   | MED-ECHO                                          | HQO 2017 <sup>35</sup><br>CIHI 2018 <sup>4</sup>                               |
|                | Visit to the regular primary care provider within 7 days following a hospitalization | Visits to the regular primary care provider within 7 days following an acute care hospitalization | DAD, OHIP, CAPE, IPDB | MED-ECHO, Fee-for-service medical services (RAMQ) | HQO 2017 <sup>35</sup>                                                         |
|                | Readmission to the hospital within 30 days following a hospitalization               | Readmission to the hospital within 30 days following a hospitalization                            | DAD                   | MED-ECHO                                          | HQO 2017 <sup>35</sup>                                                         |
| EFFECTIVE CARE | Diagnosis at an early stage of the disease                                           | Age at first case ascertainment of dementia                                                       | DAD, OHIP, ODB, RPDB  | FIPA                                              | ACOVE 2007 <sup>17</sup><br>CCCDTD 2020 <sup>9</sup><br>CIHI 2018 <sup>4</sup> |
|                | Dementia diagnosed by the regular primary care provider                              | First case of dementia ascertained by the regular primary care provider                           | OHIP, CAPE, ODB, IPDB | Fee-for-service medical services (RAMQ)           | CCCDTD 199 <sup>5</sup><br>CCCDTD 2014 <sup>8</sup>                            |

|                                                                               |                                                                                                                                           |                       |                                                                           |                                                                                               |
|-------------------------------------------------------------------------------|-------------------------------------------------------------------------------------------------------------------------------------------|-----------------------|---------------------------------------------------------------------------|-----------------------------------------------------------------------------------------------|
| Receipt of blood tests                                                        | Receipt of blood tests                                                                                                                    | To be determined      | To be determined                                                          | CCCDTD 2007 <sup>7</sup><br>CCCDTD 1999 <sup>6</sup><br>Sivananthan et al. 2015 <sup>26</sup> |
| Medications prescribed for dementia                                           | Drug therapies dispensed for dementia such as cholinesterase inhibitors (e.g. Rivastigmine, Galantamine, Donepezil) or memantine for 65+  | ODB                   | Pharmaceutical services (RAMQ)                                            | CCCDTD 1999 <sup>6</sup>                                                                      |
| First medication for dementia prescribed by the regular primary care provider | Dispensed cholinesterase inhibitors (e.g. Rivastigmine, Galantamine, Donepezil) or memantine for 65+ by the regular primary care provider | ODB, CAPE, OHIP, IPDB | Pharmaceutical services (RAMQ)<br>Fee-for-service medical services (RAMQ) | CCCDTD 1999 <sup>6</sup><br>ACOVE 2007 <sup>17</sup><br>CCCDTD 2014 <sup>8</sup>              |
| Annual visit to the regular primary care provider                             | Visits to the regular primary care provider in the last 12 months                                                                         | OHIP, CAPE, IPDB      | Fee-for-service medical services (RAMQ)                                   | HQO 2017 <sup>35</sup><br>ACOVE 2007 <sup>17</sup>                                            |



|                   |                                                                                         |                                                                                |                                                                                 |                                         |                                                                                                |
|-------------------|-----------------------------------------------------------------------------------------|--------------------------------------------------------------------------------|---------------------------------------------------------------------------------|-----------------------------------------|------------------------------------------------------------------------------------------------|
|                   | Referrals to specialists in dementia originating from the regular primary care provider | Visits to cognition specialists (e.g. geriatrician, neurologist, psychiatrist) | OHIP                                                                            | Fee-for-service medical services (RAMQ) | CCCDTD 1991 <sup>5</sup><br>Sivananthan et al. 2015 <sup>26</sup><br>CCCDTD 1999 <sup>6</sup>  |
|                   | Referrals to other specialists originating from the regular primary care provider       | Visits to other specialists (e.g. cardiologist, oncologist)                    | OHIP                                                                            | Fee-for-service medical services (RAMQ) | Sivananthan et al. 2015 <sup>26</sup><br>CCCDTD 1999 <sup>6</sup>                              |
| EFFICIENT CARE    | Annual cost of health services                                                          | Annual cost of health services                                                 | DAD, CCRS, NACRS, OHIP, HCD, ODB, OMHRS, NRS (Wodchis et al. 2016) <sup>e</sup> | APR-DRG, RAMQ, BDCU, MED-ECHO, I-CLSC   | HQO 2017 <sup>35</sup>                                                                         |
|                   | Duplicate medical tests                                                                 | Receipt of duplicate medical tests (e.g. blood tests, brain CT/MRI scans)      | To be determined                                                                | To be determined                        | CCCDTD 2014 <sup>23</sup><br>Sivananthan et al. 2015 <sup>26</sup><br>ACOVE 2007 <sup>17</sup> |
| POPULATION HEALTH | Yearly flu shot (immunization for influenza)                                            | Receipt of an influenza vaccine                                                | To be determined                                                                | Pharmaceutical services (RAMQ)          | HQO 2017 <sup>35</sup><br>ACOVE 2007 <sup>17</sup>                                             |
|                   | Other recommended immunizations                                                         | Receipt of another recommended vaccine (e.g. pneumococcal, shingles)           | To be determined                                                                | Pharmaceutical services (RAMQ)          | HQO 2017 <sup>35</sup><br>ACOVE 2007 <sup>17</sup>                                             |

|                       |                                                                                                                                              |                                                                                                                                                |                  |                                         |                                                                                                                          |
|-----------------------|----------------------------------------------------------------------------------------------------------------------------------------------|------------------------------------------------------------------------------------------------------------------------------------------------|------------------|-----------------------------------------|--------------------------------------------------------------------------------------------------------------------------|
| SAFETY                | Having a high number of medications                                                                                                          | Number of medications dispensed concurrently or over a specified period of time                                                                | ODB              | Pharmaceutical services (RAMQ)          | CCCDTD 2020 <sup>9</sup><br>ACOVE 2007 <sup>17</sup>                                                                     |
|                       | Potentially inappropriate prescriptions for medications associated with serious side effects prescribed by the regular primary care provider | Dispensed potentially inappropriate medications (e.g. benzodiazepines, antipsychotics, anticholinergics, tricyclic antidepressants, trazodone) | ODB, CAPE        | Pharmaceutical services (RAMQ)          | HQO 2017 <sup>35</sup><br>CCCDTD 2007 <sup>7</sup><br>Sivananthan et al. 2015 <sup>26</sup><br>ACOVE 2007 <sup>17</sup>  |
| PATIENT-CENTERED CARE | Access to counselling for patients                                                                                                           | Visits for patient counselling                                                                                                                 | To be determined | Fee-for-service medical services (RAMQ) | CCCDTD 1999 <sup>6</sup><br>DMWG 2014 <sup>15</sup><br>Sivananthan et al. 2015 <sup>26</sup><br>ACOVE 2007 <sup>17</sup> |
|                       | Access to counselling for caregivers                                                                                                         | Visits for caregiver counselling                                                                                                               | To be determined | Fee-for-service medical services (RAMQ) | CCCDTD 1999 <sup>6</sup><br>DMWG 2014 <sup>15</sup><br>Sivananthan et al. 2015 <sup>26</sup><br>ACOVE 2007 <sup>17</sup> |
|                       | Access to home care                                                                                                                          | Use of home care services                                                                                                                      | HCD              | I-CLSC                                  | CCCDTD 1999 <sup>6</sup><br>DMWG 2014 <sup>15</sup><br>Sivananthan et al. 2015 <sup>26</sup>                             |

|        |                                                                                     |                                                                                                                   |                                     |                                         |                                                                               |
|--------|-------------------------------------------------------------------------------------|-------------------------------------------------------------------------------------------------------------------|-------------------------------------|-----------------------------------------|-------------------------------------------------------------------------------|
|        | Access to long-term care                                                            | Admission to long-term care                                                                                       | CCRS-LTC                            | To be determined                        | HQO 2018 <sup>25</sup>                                                        |
|        | Number of days spent in long-term care                                              | Number of days spent in long-term care                                                                            | CCRS-LTC                            | To be determined                        | CIHI 2018 <sup>4</sup>                                                        |
|        | Access to palliative end-of-life care provided by the regular primary care provider | Visits for palliative care                                                                                        | OHIP, CAPE, DAD, HCD                | Fee-for-service medical services (RAMQ) | HQO 2017 <sup>35</sup><br>DMWG 2014 <sup>15</sup><br>CCCDTD 2007 <sup>7</sup> |
|        | Number of days spent in hospital in last 3 months of life                           | Number of days spent in acute care hospital in last 3 months of life                                              | DAD                                 | MED-ECHO,                               | Expert Committee                                                              |
|        | Dying at home                                                                       | Place of death (e.g. acute care hospital, home, other)                                                            | CCRS-LTC, HCD, RAI, RPDB, ORGD, DAD | RED                                     | Expert Committee                                                              |
| EQUITY | Equitable care across all patients                                                  | Stratification by specific/available sociodemographic variables (e.g. age, sex, income, region, immigrant status) | OHIP                                | FIPA                                    | HQO 2017 <sup>35</sup>                                                        |

Footnote:

CAPE: Client Agency Program Enrolment; OHIP: Ontario Health Insurance Plan; IPDB: ICES Physician Database; NACRS: The National Ambulatory Care Reporting System; DAD: Discharge Abstract Database; ODB: Ontario Drug Benefit; HCD: The Home

Care Database; CCRS-LTC: Continuing Care Reporting System; RAI: Resident Assessment Instrument; NRS: National Rehabilitation Reporting System; OMHRS: Mental Health Reporting System; RPDB: Registered Persons Database; ORGD: Vital Statistics - Death (Office of the Registrar General - Deaths); UPC: Usual Provider of Care; CTAS: Canadian Triage Acuity Scale

MED-ECHO: Maintenance et exploitation des données pour l'étude de la clientèle hospitalière; BDCU: Banque de données communes des urgences; I-CLSC: Système d'information sur la clientèle et les services des CSSS - mission CLSC; RAMQ: Régie de l'assurance maladie du Québec; FIPA: Fichier d'inscription des personnes assurées; APR-DRG: All Patient Refined Diagnosis Related Groups; RED : Registre des événements démographiques.

\* Memantine not covered in the Ontario Drug Formulary through the Ontario Drug Benefit Program, and therefore does not appear in the ODB

- a. Glazier R, Moineddin R, Agha M, Zagorski B, Hall R, Manuel D, et al. The impact of not having a primary care physician among people with chronic conditions. ICES Investigative Report Toronto: Institute for Clinical Evaluative Sciences. 2008:1-30.
- b. Ontario Ministry of Health and Long-Term Care, E.H.S.B. Prehospital Canadian Triage & Acuity Scale: Prehospital CTAS Paramedic Guide. 2016; Available from:  
[http://www.lhsc.on.ca/About\\_Us/Base\\_Hospital\\_Program/Education/PrehospitalCTASParamedicGuide\\_December312016\\_Version2.0.pdf](http://www.lhsc.on.ca/About_Us/Base_Hospital_Program/Education/PrehospitalCTASParamedicGuide_December312016_Version2.0.pdf).
- c. Bice TW, Boxerman SB. A quantitative measure of continuity of care. Med Care. 1977;15(4):347-9.
- d. Laberge, M., et al., Hospitalizations for ambulatory care sensitive conditions across primary care models in Ontario, Canada. Soc Sci Med, 2017. 181: p. 24-33.
- e. Wodchis WP, Austin PC, Henry DA. A 3-year study of high-cost users of health care. CMAJ. 2016; 188(3) :182-8
